# Supplementary material
Source: PubMed Central journal article supplement (PMC3422694)
Supplement: NIHMS389496-supplement-01.pdf [file NIHMS389496-supplement-01.pdf]

Table S1. PCR Primers, Related to Experimental Procedures

| <b>Primer</b>       | <b>Sequence</b>                | <b>Application</b> |
|---------------------|--------------------------------|--------------------|
| s CiA:Oct4 -10256   | CCCAAATACGTGGAGCTGT            | real-time PCR      |
| as CiA:Oct4 -10256  | AGGGAAGGCTAAAGGCAAAA           | real-time PCR      |
| s CiA:Oct4 -3077    | ACCACAGCAGCCAAGAGATT           | real-time PCR      |
| as CiA:Oct4 -3077   | GTCCACCAGCATGAAAAGGT           | real-time PCR      |
| s CiA:Oct4 -2241    | GGGAGGAACTGGGTGTGGGGAGGTTGTAG  | real-time PCR      |
| as CiA:Oct4 -2241   | AATAGCAGATTAAGGAAGGGCTAGGACGAG | real-time PCR      |
| s CiA:Oct4 -1485    | CAGAGCATGGTGTAGGAGCA           | real-time PCR      |
| as CiA:Oct4 -1485   | GCTGGCGGAAAGACACTAAG           | real-time PCR      |
| s CiA:Oct4 -739     | GCACTTCTCTGGGGTCTCTG           | real-time PCR      |
| as CiA:Oct4 -739    | ACCCACCCGTCTAGAGTCCT           | real-time PCR      |
| s CiA:Oct4 -309     | GAGCTTGCATGCCTGCAGGT           | real-time PCR      |
| as CiA:Oct4 -309    | CAGGAGGCCTTCATTTTCAA           | real-time PCR      |
| s CiA:Oct4 -169     | CTAGAGGATCCGAGGACCAATTG        | real-time PCR      |
| as CiA:Oct4 -169    | AATCCCACCCTCTAGCCTTG           | real-time PCR      |
| s CiA:Oct4 489      | CACATGAAGCAGCAGACTT            | real-time PCR      |
| as CiA:Oct4 489     | AGTTCACCTTGATGCCGTTC           | real-time PCR      |
| s CiA:Oct4 1746     | CTGGCCCTTGTCATGTAGGT           | real-time PCR      |
| as CiA:Oct4 1746    | GCCAGAGGCCACTTGTGTAG           | real-time PCR      |
| s CiA:Oct4 3087     | CGTTGGCTACCCGTGATATT           | real-time PCR      |
| as CiA:Oct4 3087    | CGCTTGGTCGGTCTTTATTC           | real-time PCR      |
| s CiA:Oct4 4400     | ACCTTTGCTCCAACAACCTG           | real-time PCR      |
| as CiA:Oct4 4400    | TAAGTTGCAGCGTGTGAACC           | real-time PCR      |
| s CiA:Oct4 5300     | ACACACCAGAAGAGGGCATC           | real-time PCR      |
| as CiA:Oct4 5300    | GAACCATTGTTGGGAATTGG           | real-time PCR      |
| s endo Oct4         | TTCCCCATGGCTGGACAC             | real-time PCR      |
| as endo Oct4        | CAGTCCAACCTGAGGTCCAC           | real-time PCR      |
| s intergenic ctrl   | ATGCCCTCAGCTATCACAC            | real-time PCR      |
| as intergenic ctrl  | GGACAGACATCTGCCAAGGT           | real-time PCR      |
|                     |                                |                    |
| s bisCiA:Oct4 -318  | GAGTAATTGGTTTGTGAGGTGTTAAATATT | bisulfite PCR      |
| as bisCiA:Oct4 +103 | CAACCATAAAAAAATAAACACCCC       | bisulfite PCR      |
| s bisOct4 -485      | TATAAGATGGAATATTGTGTTTTGAAAA   | bisulfite PCR      |
| as bisOct4 -32      | CCACCCTCTAACCTTAACCTCTAAC      | bisulfite PCR      |
